# Supplementary material
Source: MDPI journal article supplement (https://www.mdpi.com/1999-4907/9/5/243)
Supplement: s1 [file s1]

Archive with 5 entries (5 files):
- forests-298155-SI/FigureS1_ForestCompositionGNN.pdf
- forests-298155-SI/FigureS2_ForestStructureGNN.pdf
- forests-298155-SI/TableS1_SelectedFireEvents.csv
- forests-298155-SI/TableS2_LandCoverTypeGAP.csv
- forests-298155-SI/TableS3_ForestTypeGNN.csv
