# Supplementary material
Source: MDPI journal article supplement (https://www.mdpi.com/1999-4907/9/5/243)
Supplement: s1 [file s1 › forests-298155-SI/FigureS1_ForestCompositionGNN.pdf]

**Supplemental material for:**

Composition and structure of forest fire refugia: What are the ecosystem legacies across burned landscapes? (Forests, 2018)

**Authors:**

Garrett W. Meigs, Meg A. Krawchuk

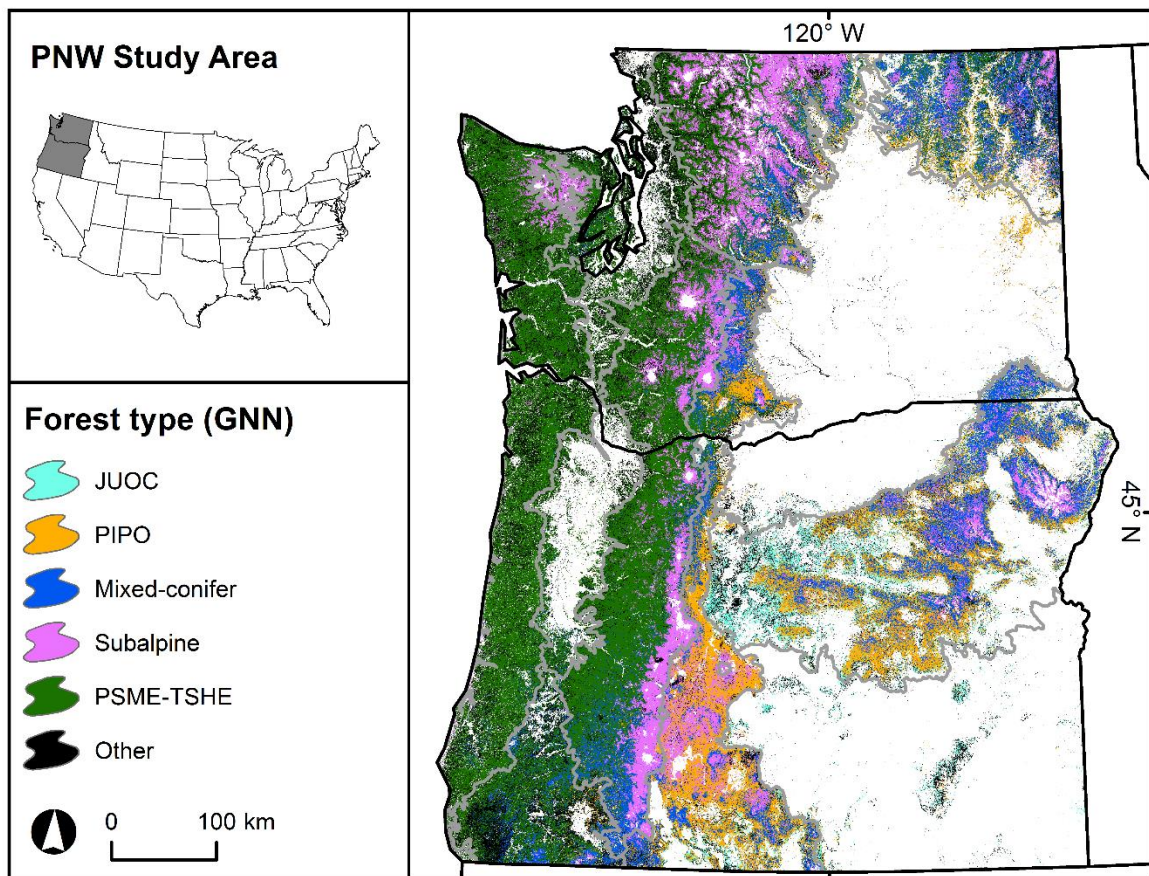

**Figure S1.** Forest composition across the Pacific Northwest study area. Forest types are based on live basal area of dominant tree species according to 2003 (pre-fire) GNN maps developed after Ohmann et al. [38]. See Methods for details regarding forest type classification. See Table 3 for forest type codes and extent across study fires. See Figure 2 for ecoregion identification. See Figure 4 for landscape spatial patterns.
