# Supplementary material
Source: MDPI journal article supplement (https://www.mdpi.com/1999-4907/9/5/243)
Supplement: s1 [file s1 › forests-298155-SI/FigureS2_ForestStructureGNN.pdf]

**Supplemental material for:**

Composition and structure of forest fire refugia: What are the ecosystem legacies across burned landscapes? (Forests, 2018)

**Authors:**

Garrett W. Meigs, Meg A. Krawchuk

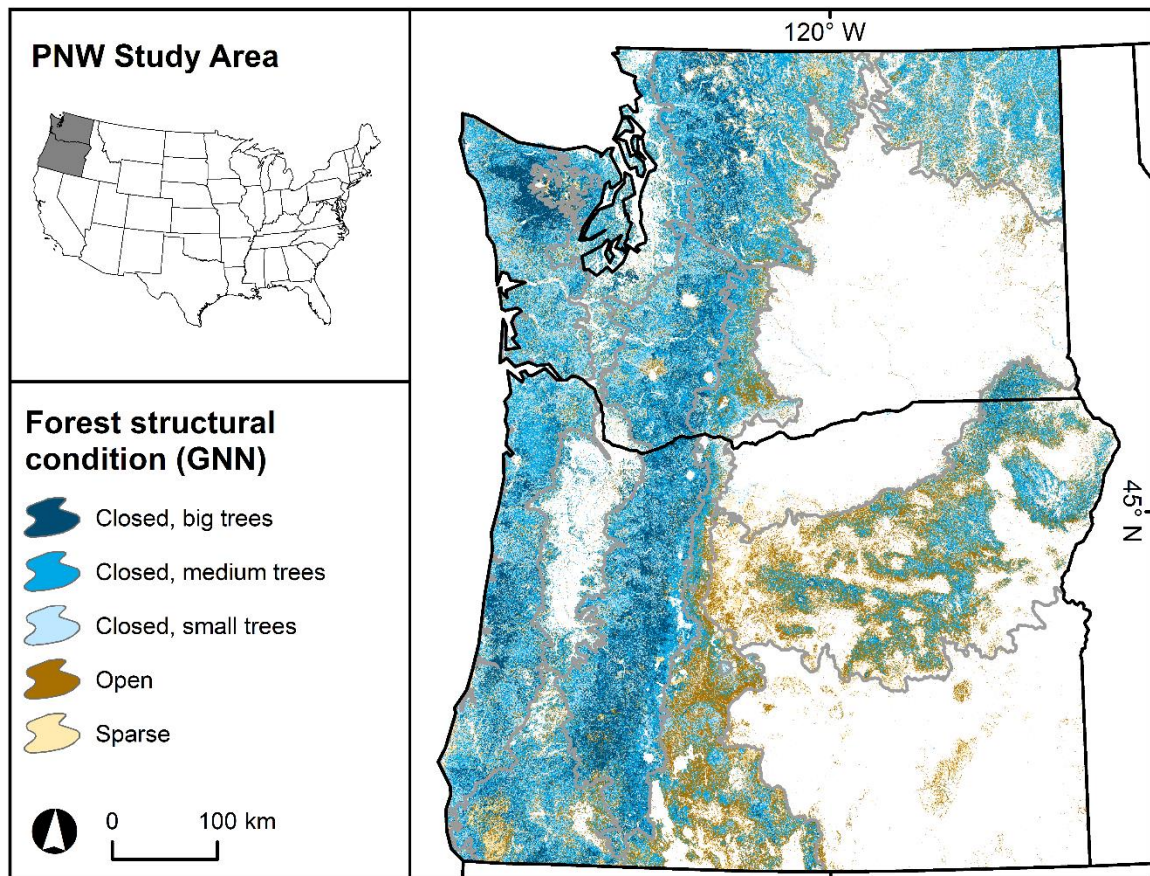

**Figure S2.** Forest structure across the Pacific Northwest study area. Forest structural condition classes are based on live tree canopy cover and size classes according to 2003 (pre-fire) GNN maps developed after Ohmann et al. [38]. See Methods for details regarding forest type classification. See Table 3 for forest type codes and extent across study fires. See Figure 2 for ecoregion identification. See Figure 4 for landscape spatial patterns.
