# Supplementary material
Source: MDPI journal article supplement (https://www.mdpi.com/1999-4907/9/5/243)
Supplement: s1 [file s1 › forests-298155-SI/TableS1_SelectedFireEvents.csv]

Fire_ID(MTBS)	Fire_Name	Year	Extent_ha	Ecoregion_Majority_Name
OR4228912355220050825	DEER CREEK	2005	627	Klamath Mountains
OR4236612373520080816	WILD RIVERS COMPLEX (HORSE MOUNTAIN)	2008	454	Klamath Mountains
OR4242312371620100813	OAK FLAT	2010	3204	Klamath Mountains
OR4252012150720140713	MOCCASIN HILL	2014	788	Eastern Cascades Slopes and Foothills
OR4261812347620130726	BRIMSTONE FIRE	2013	989	Klamath Mountains
OR4262512225320140731	790 FIRE	2014	1087	Cascades
OR4273212351520130726	DADS	2013	10102	Klamath Mountains
OR4285712358520130726	NORTH RABBIT	2013	10115	Klamath Mountains
OR4292312275720130726	WHISKEY	2013	6681	Cascades
OR4303812227820150801	NATIONAL CREEK COMPLEX	2015	8711	Cascades
OR4304512272320130726	BUCKEYE	2013	722	Cascades
OR4315612245520090922	RAINBOW CREEK	2009	2084	Cascades
OR4332112296020150728	CABLE CROSSING	2015	872	Cascades
OR4345712228420090912	TUMBLEBUG COMPLEX	2009	5910	Cascades
OR4373612257320140811	DECEPTION CREEK	2014	2437	Cascades
OR4401611881420070706	CALAMITY COMPLEX (GRAPPLE)	2007	943	Blue Mountains
OR4417011876620120828	PARISH CABIN	2012	2727	Blue Mountains
OR4417812169920120909	POLE CREEK	2012	10899	Eastern Cascades Slopes and Foothills
OR4425512018720140717	FOX	2014	3780	Blue Mountains
OR4426012192420100819	SCOTT MOUNTAIN	2010	1360	Cascades
OR4426911945020140801	SOUTH FORK COMPLEX	2014	24341	Blue Mountains
OR4427112168020060723	CASCADE CREST COMPLEX (BLACK CRATER)	2006	3841	Eastern Cascades Slopes and Foothills
OR4428411896120150812	CANYON CREEK COMPLEX	2015	40708	Blue Mountains
OR4431411958420150629	CORNER CREEK 0297 PR	2015	9562	Blue Mountains
OR4435212182320110828	SHADOWLAKE	2011	2730	Cascades
OR4443112149820080817	SUMMIT SPRINGS COMPLEX	2008	812	Eastern Cascades Slopes and Foothills
OR4449812022320080807	BRIDGE CREEK	2008	1710	Blue Mountains
OR4454812036520140714	BAILEY BUTTE	2014	4254	Blue Mountains
OR4459311956220150627	SUGAR LOAF 0268 RN	2015	1684	Blue Mountains
OR4463612175020140713	BEAR BUTTE 2	2014	585	Cascades
OR4463812121020110822	ELK	2011	472	Blue Mountains
OR4468212159620070712	WSA LIGHTNING COMPLEX (BIDDLE PASS)	2007	5102	Eastern Cascades Slopes and Foothills
OR4471312061120140713	DONNYBROOK	2014	8155	Blue Mountains
OR4473012013820110825	DEADDOG	2011	583	Blue Mountains
OR4473312173020120804	WATERFALLS 2	2012	4967	Cascades
OR4473511854320130812	VINEGAR	2013	586	Blue Mountains
OR4474212096020110801	312	2011	2624	Blue Mountains
OR4477512179820100819	PYRAMID	2010	602	Cascades
OR4483012137720150812	COUNTY LINE 2	2015	11468	Blue Mountains
OR4485612210620110826	MOTHERLODE	2011	1165	Cascades
OR4487112004920070803	SHELTON	2007	1102	Blue Mountains
OR4487212099520120714	BAKER CANYON	2012	2238	Columbia Plateau
OR4487812088220140714	0347 RN	2014	5779	Columbia Plateau
OR4493212174420140716	LOGGING UNIT FIRES	2014	2307	Eastern Cascades Slopes and Foothills
OR4494711848520070729	TROUT MEADOWS	2007	1620	Blue Mountains
OR4496511877520070815	OTTER CREEK	2007	1178	Blue Mountains
OR4499212139420040725	LOG SPRINGS	2004	3255	Blue Mountains
OR4500511742020150811	EAGLE	2015	5869	Blue Mountains
OR4503212042520080703	DEEP CREEK	2008	1935	Columbia Plateau
OR4506011716020060904	TWIN LAKES COMPLEX	2006	4488	Blue Mountains
OR4518711749920140729	CHINA CAP	2014	448	Blue Mountains
OR4519612218020140914	36 PIT	2014	2363	Cascades
OR4530512138720070712	BALL POINT	2007	525	Eastern Cascades Slopes and Foothills
OR4534012157620060807	MT. HOOD COMPLEX	2006	733	Cascades
OR4542512164220110827	DOLLARLAKE	2011	2419	Cascades
OR4551712135520130816	GOVERNMENT FLATS COMPLEX	2013	4449	Eastern Cascades Slopes and Foothills
OR4582911805320050813	BURNT CABIN	2005	871	Blue Mountains
WA4576012151620120905	HIGHWAY 141	2012	842	Eastern Cascades Slopes and Foothills
WA4594612067220110907	MONASTERYCOMPLEX	2011	1491	Eastern Cascades Slopes and Foothills
WA4606711811820150720	BLUE CREEK	2015	2424	Blue Mountains
WA4606911776320150814	BUTTE CREEK	2015	31961	Blue Mountains
WA4611611766020150814	BEAR RIDGE	2015	746	Blue Mountains
WA4612512155020120909	CASCADE CREEK	2012	7862	Cascades
WA4613412137420150811	COUGAR CREEK	2015	18461	Eastern Cascades Slopes and Foothills
WA4616811780620060821	COLUMBIA COMPLEX	2006	48009	Blue Mountains
WA4628511761620050805	SCHOOL	2005	20923	Blue Mountains
WA4649412121520090729	DISCOVERY	2009	1716	Eastern Cascades Slopes and Foothills
WA4651612128520130809	CONRAD LAKE	2013	448	Eastern Cascades Slopes and Foothills
WA4668812104420120908	WILD ROSE	2012	698	Eastern Cascades Slopes and Foothills
WA4682212107120150912	MEEKS TABLE	2015	966	Eastern Cascades Slopes and Foothills
WA4715412055020140803	SNAG CANYON	2014	5003	Columbia Plateau
WA4724812058320120908	TABLE MOUNTAIN COMPLEX	2012	26664	Eastern Cascades Slopes and Foothills
WA4745512051520120908	POISON	2012	2238	North Cascades
WA4750112329120060725	BEAR GULCH II	2006	419	Coast Range
WA4750312068220140803	HANSEL CREEK	2014	561	North Cascades
WA4769312310920110831	BIGHUMP	2011	567	Coast Range
WA4769812380320150615	PARADISE	2015	1139	Coast Range
WA4770812082320140715	CHIWAUKUM COMPLEX	2014	5303	North Cascades
WA4784912078720050730	DIRTY FACE	2005	557	North Cascades
WA4788112022120150814	FIRST CREEK	2015	3045	North Cascades
WA4797012073420120908	BASALT	2012	690	North Cascades
WA4799112039420040626	POT PEAK-SISI RIDGE COMPLEX	2004	14717	North Cascades
WA4800511820420150815	CARPENTER RD.	2015	24828	Northern Rockies
WA4802412060120140716	DUNCAN	2014	5522	North Cascades
WA4803111998320120916	GOAT	2012	3213	North Cascades
WA4814412059320070805	DOMKE LAKE COMPLEX	2007	4063	North Cascades
WA4817812013520120908	BUCKHORN	2012	1989	North Cascades
WA4822612066620150629	WOLVERINE	2015	18137	North Cascades
WA4838112024520150819	TWISP RIVER	2015	4558	Columbia Plateau
WA4838311788820150814	MARBLE VALLEY	2015	1388	Northern Rockies
WA4840611873020150701	TWENTY-ONE MILE GRADE	2015	1014	Northern Rockies
WA4842411713920150812	TOWER	2015	10028	Northern Rockies
WA4842512040320140802	LITTLE BRIDGE CREEK	2014	2300	North Cascades
WA4853211998720060724	TRIPOD COMPLEX (TRIPOD)	2006	24165	North Cascades
WA4868512125620150810	UPPER SKAGIT COMPLEX	2015	2541	North Cascades
WA4875611846220150811	STICKPIN	2015	19042	Northern Rockies
WA4877911820520150814	RENNER	2015	5656	Northern Rockies
WA4884111998320060703	TRIPOD COMPLEX (SPUR PEAK)	2006	45028	North Cascades
WA4892012027620060905	VAN PEAK	2006	576	North Cascades
