# Supplementary material
Source: MDPI journal article supplement (https://www.mdpi.com/1999-4907/9/5/243)
Supplement: s1 [file s1 › forests-298155-SI/TableS2_LandCoverTypeGAP.csv]

Ecological_System_Code(GAP_ESLF_CODE)	Ecological_System_Name(GAP_CN_LEVEL3)	Forest_Mask_LEMMA	Land_Cover_Type_Meigs
1	Disturbed, Non-specific	0	Disturbed
2	Recently Burned	1	Forest
21	Developed, Open Space	0	Developed
22	Developed, Low Intensity	0	Developed
23	Developed, Medium Intensity	0	Developed
24	Developed, High Intensity	0	Developed
33	Quarries, Mines, Gravel Pits and Oil Wells	0	Developed
61	Orchards Vineyards and Other High Structure Agriculture	0	Crops
81	Pasture/Hay	0	Crops
82	Cultivated Cropland	0	Crops
2101	Undifferentiated Barren Land	0	Barren
2102	Disturbed/Successional - Recently Chained Pinyon-Juniper	1	Forest
2201	Open Water (Fresh)	0	Water
2202	Open Water (Brackish/Salt)	0	Water
2301	Unconsolidated Shore	0	Barren
3116	Temperate Pacific Intertidal Mudflat	0	Water
3118	North Pacific Alpine and Subalpine Bedrock and Scree	0	Alpine
3120	North American Warm Desert Bedrock Cliff and Outcrop	0	Barren
3121	North American Warm Desert Active and Stabilized Dune	0	Barren
3122	Temperate Pacific Freshwater Mudflat	0	Herbaceous
3123	North American Warm Desert Badland	0	Barren
3128	Inter-Mountain Basins Volcanic Rock and Cinder Land	0	Barren
3129	Rocky Mountain Cliff, Canyon and Massive Bedrock	0	Barren
3130	North American Alpine Ice Field	0	Alpine
3135	Rocky Mountain Alpine Bedrock and Scree	0	Barren
3139	Inter-Mountain Basins Shale Badland	0	Barren
3140	North Pacific Volcanic Rock and Cinder Land	0	Barren
3143	North American Warm Desert Pavement	0	Barren
3152	Inter-Mountain Basins Wash	0	Barren
3155	North Pacific Montane Massive Bedrock, Cliff and Talus	0	Barren
3158	North Pacific Coastal Cliff and Bluff	0	Barren
3159	North Pacific Serpentine Barren	0	Barren
3160	Inter-Mountain Basins Active and Stabilized Dune	0	Shrub
3161	North American Warm Desert Playa	0	Barren
3164	Mediterranean California Southern Coastal Dune	0	Barren
3165	Mediterranean California Northern Coastal Dune	0	Barren
3166	Mediterranean California Coastal Bluff	0	Barren
3167	Mediterranean California Serpentine Barrens	0	Barren
3168	Southern California Coast Ranges Cliff and Canyon	0	Barren
3169	Central California Coast Ranges Cliff and Canyon	0	Barren
3170	Klamath-Siskiyou Cliff and Outcrop	0	Barren
3171	Sierra Nevada Cliff and Canyon	0	Barren
3172	Mediterranean California Alpine Bedrock and Scree	0	Alpine
3173	Inter-Mountain Basins Cliff and Canyon	0	Barren
3174	Columbia Plateau Ash and Tuff Badland	0	Barren
3177	North Pacific Maritime Coastal Sand Dune and Strand	0	Barren
3179	Inter-Mountain Basins Playa	0	Barren
3180	North American Warm Desert Volcanic Rockland	0	Barren
3183	Colorado Plateau Mixed Bedrock Canyon and Tableland	0	Barren
4101	North Pacific Oak Woodland	1	Forest
4103	Northern Rocky Mountain Western Larch Savanna	1	Forest
4104	Rocky Mountain Aspen Forest and Woodland	1	Forest
4105	Rocky Mountain Bigtooth Maple Ravine Woodland	1	Forest
4201	Central and Southern California Mixed Evergreen Woodland	1	Forest
4202	California Coastal Redwood Forest	1	Forest
4203	Colorado Plateau Pinyon-Juniper Woodland	1	Forest
4204	Columbia Plateau Western Juniper Woodland and Savanna	1	Forest
4205	East Cascades Mesic Montane Mixed-Conifer Forest and Woodland	1	Forest
4206	Great Basin Pinyon-Juniper Woodland	1	Forest
4207	Inter-Mountain Basins Subalpine Limber-Bristlecone Pine Woodland	1	Forest
4208	Klamath-Siskiyou Lower Montane Serpentine Mixed Conifer Woodland	1	Forest
4209	Klamath-Siskiyou Upper Montane Serpentine Mixed Conifer Woodland	1	Forest
4210	Madrean Encinal	1	Forest
4211	Madrean Pine-Oak Forest and Woodland	1	Forest
4212	Madrean Pinyon-Juniper Woodland	1	Forest
4214	Mediterranean California Dry-Mesic Mixed Conifer Forest and Woodland	1	Forest
4215	Mediterranean California Mesic Mixed Conifer Forest and Woodland	1	Forest
4216	Mediterranean California Mixed Oak Woodland	1	Forest
4217	Mediterranean California Lower Montane Black Oak-Conifer Forest and Woodland	1	Forest
4218	California Montane Jeffrey Pine-(Ponderosa Pine) Woodland	1	Forest
4219	Mediterranean California Red Fir Forest	1	Forest
4220	Mediterranean California Subalpine Woodland	1	Forest
4221	Mediterranean California Mesic Serpentine Woodland and Chaparral	1	Forest
4222	North Pacific Dry Douglas-fir-(Madrone) Forest and Woodland	1	Forest
4223	North Pacific Hypermaritime Sitka Spruce Forest	1	Forest
4224	North Pacific Maritime Dry-Mesic Douglas-fir-Western Hemlock Forest	1	Forest
4225	North Pacific Maritime Mesic Subalpine Parkland	1	Forest
4226	North Pacific Maritime Mesic-Wet Douglas-fir-Western Hemlock Forest	1	Forest
4228	North Pacific Mountain Hemlock Forest	1	Forest
4229	North Pacific Mesic Western Hemlock-Silver Fir Forest	1	Forest
4230	Mediterranean California Mixed Evergreen Forest	1	Forest
4231	Northern California Mesic Subalpine Woodland	1	Forest
4232	Northern Rocky Mountain Dry-Mesic Montane Mixed Conifer Forest	1	Forest
4233	Northern Rocky Mountain Subalpine Woodland and Parkland	1	Forest
4234	Northern Rocky Mountain Mesic Montane Mixed Conifer Forest	1	Forest
4237	Rocky Mountain Lodgepole Pine Forest	1	Forest
4238	Southern Rocky Mountain Dry-Mesic Montane Mixed Conifer Forest and Woodland	1	Forest
4239	Southern Rocky Mountain Mesic Montane Mixed Conifer Forest and Woodland	1	Forest
4240	Northern Rocky Mountain Ponderosa Pine Woodland and Savanna	1	Forest
4241	Southern Rocky Mountain Ponderosa Pine Woodland	1	Forest
4242	Rocky Mountain Subalpine Dry-Mesic Spruce-Fir Forest and Woodland	1	Forest
4243	Rocky Mountain Subalpine Mesic Spruce-Fir Forest and Woodland	1	Forest
4244	Rocky Mountain Subalpine-Montane Limber-Bristlecone Pine Woodland	1	Forest
4245	Sierra Nevada Subalpine Lodgepole Pine Forest and Woodland	1	Forest
4266	Middle Rocky Mountain Montane Douglas-fir Forest and Woodland	1	Forest
4267	Rocky Mountain Poor-Site Lodgepole Pine Forest	1	Forest
4268	California Coastal Closed-Cone Conifer Forest and Woodland	1	Forest
4269	Sierran-Intermontane Desert Western White Pine-White Fir Woodland	1	Forest
4271	North Pacific Hypermaritime Western Red-cedar-Western Hemlock Forest	1	Forest
4272	North Pacific Dry-Mesic Silver Fir-Western Hemlock-Douglas-fir Forest	1	Forest
4301	East Cascades Oak-Ponderosa Pine Forest and Woodland	1	Forest
4302	Inter-Mountain Basins Aspen-Mixed Conifer Forest and Woodland	1	Forest
4303	Inter-Mountain Basins Curl-leaf Mountain Mahogany Woodland and Shrubland	1	Forest
4304	North Pacific Broadleaf Landslide Forest and Shrubland	1	Forest
4329	North Pacific Wooded Volcanic Flowage	1	Forest
4333	North Pacific Lowland Mixed Hardwood-Conifer Forest and Woodland	1	Forest
5201	Colorado Plateau Mixed Low Sagebrush Shrubland	0	Shrub
5202	Columbia Plateau Scabland Shrubland	0	Shrub
5203	Inter-Mountain Basins Mat Saltbush Shrubland	0	Shrub
5204	Mediterranean California Alpine Fell-Field	0	Alpine
5205	North Pacific Dry and Mesic Alpine Dwarf-Shrubland, Fell-field and Meadow	0	Alpine
5207	Rocky Mountain Alpine Dwarf-Shrubland	0	Shrub
5208	Rocky Mountain Alpine Tundra/Fell-field/Dwarf-shrub Map Unit	0	Alpine
5251	Chihuahuan Creosotebush, Mixed Desert and Thorn Scrub	0	Shrub
5255	Colorado Plateau Blackbrush-Mormon-tea Shrubland	0	Shrub
5256	Great Basin Xeric Mixed Sagebrush Shrubland	0	Shrub
5257	Inter-Mountain Basins Big Sagebrush Shrubland	0	Shrub
5258	Inter-Mountain Basins Mixed Salt Desert Scrub	0	Shrub
5259	Mojave Mid-Elevation Mixed Desert Scrub	0	Shrub
5260	North Pacific Avalanche Chute Shrubland	0	Shrub
5261	North Pacific Montane Shrubland	0	Shrub
5263	Rocky Mountain Lower Montane-Foothill Shrubland	0	Shrub
5264	Sonora-Mojave Creosotebush-White Bursage Desert Scrub	0	Shrub
5265	Sonora-Mojave Mixed Salt Desert Scrub	0	Shrub
5268	Sonoran Mid-Elevation Desert Scrub	0	Shrub
5269	Southern California Coastal Scrub	0	Shrub
5270	Southern Colorado Plateau Sand Shrubland	0	Shrub
5301	Apacherian-Chihuahuan Mesquite Upland Scrub	0	Shrub
5302	California Maritime Chaparral	0	Shrub
5303	California Mesic Chaparral	0	Shrub
5304	California Montane Woodland and Chaparral	1	Forest
5305	California Xeric Serpentine Chaparral	0	Shrub
5308	Colorado Plateau Pinyon-Juniper Shrubland	1	Forest
5309	Great Basin Semi-Desert Chaparral	0	Shrub
5310	Mogollon Chaparral	0	Shrub
5311	Northern and Central California Dry-Mesic Chaparral	0	Shrub
5312	Northern Rocky Mountain Montane-Foothill Deciduous Shrubland	0	Shrub
5313	Rocky Mountain Gambel Oak-Mixed Montane Shrubland	0	Shrub
5314	Sonora-Mojave Semi-Desert Chaparral	0	Shrub
5315	Sonoran Paloverde-Mixed Cacti Desert Scrub	0	Shrub
5316	Southern California Dry-Mesic Chaparral	0	Shrub
5326	Northern Rocky Mountain Subalpine Deciduous Shrubland	0	Shrub
5401	California Central Valley Mixed Oak Savanna	1	Forest
5402	California Coastal Live Oak Woodland and Savanna	1	Forest
5403	California Lower Montane Blue Oak-Foothill Pine Woodland and Savanna	1	Forest
5404	Inter-Mountain Basins Juniper Savanna	1	Forest
5405	Madrean Juniper Savanna	1	Forest
5407	Southern California Oak Woodland and Savanna	1	Forest
5409	Willamette Valley Upland Prairie and Savanna	0	Herbaceous
5425	Klamath-Siskiyou Xeromorphic Serpentine Savanna and Chaparral	1	Forest
5450	Apacherian-Chihuahuan Semi-Desert Grassland and Steppe	0	Herbaceous
5452	Columbia Plateau Steppe and Grassland	0	Herbaceous
5453	Columbia Plateau Low Sagebrush Steppe	0	Shrub
5454	Inter-Mountain Basins Big Sagebrush Steppe	0	Shrub
5455	Inter-Mountain Basins Montane Sagebrush Steppe	0	Shrub
5456	Inter-Mountain Basins Semi-Desert Shrub Steppe	0	Shrub
5457	Northern California Coastal Scrub	0	Shrub
7101	California Central Valley and Southern Coastal Grassland	0	Herbaceous
7102	California Mesic Serpentine Grassland	0	Herbaceous
7103	California Northern Coastal Grassland	0	Herbaceous
7106	Columbia Basin Foothill and Canyon Dry Grassland	0	Herbaceous
7107	Inter-Mountain Basins Semi-Desert Grassland	0	Herbaceous
7108	Mediterranean California Alpine Dry Tundra	0	Alpine
7109	Mediterranean California Subalpine Meadow	0	Herbaceous
7110	North Pacific Montane Grassland	0	Herbaceous
7112	Northern Rocky Mountain Lower Montane, Foothill and Valley Grassland	0	Herbaceous
7113	Northern Rocky Mountain Subalpine-Upper Montane Grassland	0	Herbaceous
7115	Columbia Basin Palouse Prairie	0	Herbaceous
7116	Rocky Mountain Alpine Fell-Field	0	Alpine
7117	Rocky Mountain Dry Tundra	0	Alpine
7118	Rocky Mountain Subalpine-Montane Mesic Meadow	0	Alpine
7119	Southern Rocky Mountain Montane-Subalpine Grassland	0	Herbaceous
7157	North Pacific Alpine and Subalpine Dry Grassland	0	Alpine
7161	North Pacific Hypermaritime Shrub and Herbaceous Headland	0	Herbaceous
7162	North Pacific Herbaceous Bald and Bluff	0	Herbaceous
8401	Introduced Upland Vegetation - Treed	1	Forest
8402	Introduced Upland Vegetation - Shrub	0	Shrub
8404	Introduced Upland Vegetation - Annual Grassland	0	Herbaceous
8406	Introduced Riparian and Wetland Vegetation	1	Forest
8407	Introduced Upland Vegetation - Perennial Grassland and Forbland	0	Herbaceous
8501	Recently burned forest	1	Forest
8502	Recently burned grassland	0	Herbaceous
8503	Recently burned shrubland	0	Shrub
8601	Harvested Forest - Northwestern Conifer Regeneration	1	Forest
8602	Harvested forest-Shrub Regeneration	1	Forest
8603	Harvested Forest - Grass/Forb Regeneration	1	Forest
9101	California Central Valley Riparian Woodland and Shrubland	1	Forest
9103	Inter-Mountain Basins Greasewood Flat	0	Shrub
9104	Inter-Mountain Basins Montane Riparian Systems	0	Shrub
9106	North Pacific Lowland Riparian Forest and Shrubland	1	Forest
9108	North Pacific Montane Riparian Woodland and Shrubland	1	Forest
9111	Northern Rocky Mountain Conifer Swamp	1	Forest
9151	North American Warm Desert Wash	0	Shrub
9155	Northern Rocky Mountain Lower Montane Riparian Woodland and Shrubland	1	Forest
9156	Rocky Mountain Lower Montane Riparian Woodland and Shrubland	1	Forest
9166	North Pacific Bog and Fen	0	Water
9168	Great Basin Foothill and Lower Montane Riparian Woodland and Shrubland	1	Forest
9170	Columbia Basin Foothill Riparian Woodland and Shrubland	1	Forest
9171	Rocky Mountain Subalpine-Montane Riparian Woodland	1	Forest
9172	North American Warm Desert Lower Montane Riparian Woodland and Shrubland	1	Forest
9173	North Pacific Shrub Swamp	0	Shrub
9178	North American Warm Desert Riparian Mesquite Bosque	0	Shrub
9182	North American Warm Desert Riparian Woodland and Shrubland	1	Forest
9187	Rocky Mountain Subalpine-Montane Riparian Shrubland	0	Shrub
9190	North Pacific Hardwood-Conifer Swamp	1	Forest
9217	Rocky Mountain Alpine-Montane Wet Meadow	0	Alpine
9219	Temperate Pacific Freshwater Aquatic Bed	0	Water
9220	North Pacific Intertidal Freshwater Wetland	0	Shrub
9221	Willamette Valley Wet Prairie	0	Herbaceous
9222	North American Arid West Emergent Marsh	0	Water
9230	North Pacific Maritime Eelgrass Bed	0	Water
9231	Columbia Plateau Vernal Pool	0	Water
9234	Rocky Mountain Subalpine-Montane Fen	1	Forest
9248	Mediterranean California Subalpine-Montane Fen	0	Water
9251	Northern California Claypan Vernal Pool	0	Water
9255	Mediterranean California Serpentine Fen	0	Water
9260	Temperate Pacific Freshwater Emergent Marsh	0	Water
9265	Temperate Pacific Montane Wet Meadow	0	Herbaceous
9266	Mediterranean California Eelgrass Bed	0	Water
9281	Temperate Pacific Tidal Salt and Brackish Marsh	0	Water
9297	Inter-Mountain Basins Alkaline Closed Depression	0	Shrub
9321	Columbia Plateau Silver Sagebrush Seasonally Flooded Shrub-Steppe	0	Shrub
9325	Mediterranean California Serpentine Foothill and Lower Montane Riparian Woodland and Seep	1	Forest
9330	Mediterranean California Foothill and Lower Montane Riparian Woodland	1	Forest
