# Supplementary material
Source: MDPI journal article supplement (https://www.mdpi.com/1999-4907/9/5/243)
Supplement: s1 [file s1 › forests-298155-SI/TableS3_ForestTypeGNN.csv]

Forest_Type_GNN	Forest_Type_GNN_Meigs_Reclass1	Forest_Type_GNN_Meigs_Reclass2
NONFOREST	NONFOREST	NONFOREST
THPL/ACMA3	Other	Other
ALRU2/THPL	Hardwood	Other
THPL/ALRU2	Other	Other
ACMA3/THPL	Hardwood	Other
PSME/TSHE	PSME-TSHE	PSME-TSHE
PSME	PSME-TSHE	PSME-TSHE
PSME/THPL	PSME-TSHE	PSME-TSHE
THPL/QUGA4	Other	Other
ACMA3/ALRU2	Hardwood	Other
TSHE/ALRU2	PSME-TSHE	PSME-TSHE
TSHE/ABAM	PSME-TSHE	PSME-TSHE
PSME/ALRU2	PSME-TSHE	PSME-TSHE
PSME/SALIX	PSME-TSHE	PSME-TSHE
PISI	Other	Other
REMNANT	Other	Other
ALRU2	Hardwood	Other
PSME/ACMA3	PSME-TSHE	PSME-TSHE
CHLA/PSME	Other	Other
QUGA4	Hardwood	Other
ALRU2/PSME	Hardwood	Other
TSHE/CHCH7	PSME-TSHE	PSME-TSHE
PSME/ABGRC	PSME-TSHE	Mixed-conifer
ARME/QUKE	Hardwood	Other
ARME/CADE27	Hardwood	Other
ARME	Hardwood	Other
QUGA4/QUKE	Hardwood	Other
TSHE/THPL	PSME-TSHE	PSME-TSHE
CADE27	Mixed-conifer	Mixed-conifer
PSME/CHCH7	PSME-TSHE	PSME-TSHE
QUGA4/ARME	Hardwood	Other
PSME/CADE27	PSME-TSHE	Mixed-conifer
PSME/ARME	PSME-TSHE	PSME-TSHE
PSME/LIDE3	PSME-TSHE	PSME-TSHE
PSME/QUCH2	PSME-TSHE	PSME-TSHE
ARME/PSME	Hardwood	Other
PSME/QUGA4	PSME-TSHE	PSME-TSHE
PSME/QUKE	PSME-TSHE	PSME-TSHE
ABGRC/PSME	Mixed-conifer	Mixed-conifer
CADE27/ABGRC	Mixed-conifer	Mixed-conifer
CADE27/QUKE	Mixed-conifer	Mixed-conifer
QUKE/PIPO	Hardwood	Other
QUKE/PSME	Hardwood	Other
PIPO/QUGA4	PIPO	PIPO
PIPO/ARME	PIPO	PIPO
CADE27/PSME	Mixed-conifer	Mixed-conifer
ARME/QUGA4	Hardwood	Other
QUKE/ARME	Hardwood	Other
ABGRC/PIPO	Mixed-conifer	Mixed-conifer
PSME/PIPO	PSME-TSHE	Mixed-conifer
CHCH7	Hardwood	Other
PSME/FRLA	PSME-TSHE	PSME-TSHE
TSHE/PSME	PSME-TSHE	PSME-TSHE
ABGRC/ABPRSH	Mixed-conifer	Mixed-conifer
ABAM	Subalpine	Subalpine
ABPRSH/ABGRC	Subalpine	Subalpine
ACMA3/PSME	Hardwood	Other
ALRU2/PRUNU	Hardwood	Other
PIPO/ABGRC	PIPO	PIPO
ABLA/PICO	Subalpine	Subalpine
PIPO/PSME	PIPO	PIPO
ABGRC/PIEN	Mixed-conifer	Mixed-conifer
PIPO	PIPO	PIPO
JUOC	JUOC	JUOC
JUOC/PSME	JUOC	JUOC
PIPO/JUOC	PIPO	PIPO
JUOC/PIPO	JUOC	JUOC
ABGRC/PICO	Mixed-conifer	Mixed-conifer
PICO/ABGRC	Subalpine	Subalpine
JUOC/CELE3	JUOC	JUOC
PIEN/ABAM	Subalpine	Subalpine
TSME/ABLA	Subalpine	Subalpine
PICO/ABLA	Subalpine	Subalpine
PIPO/CADE27	PIPO	PIPO
PICO	Subalpine	Subalpine
PICO/PIPO	Subalpine	Subalpine
PIPO/PICO	PIPO	PIPO
PIPO/POTR5	PIPO	PIPO
ABGRC/CADE27	Mixed-conifer	Mixed-conifer
PICO/ABPRSH	Subalpine	Subalpine
PICO/TSME	Subalpine	Subalpine
TSME/ABPRSH	Subalpine	Subalpine
ABPRSH/PIMO3	Subalpine	Subalpine
ABPRSH/TSME	Subalpine	Subalpine
ABPRSH	Subalpine	Subalpine
CELE3/JUOC	Hardwood	Other
PSME/LAOC	PSME-TSHE	Mixed-conifer
ABGRC	Mixed-conifer	Mixed-conifer
LAOC/PSME	Mixed-conifer	Mixed-conifer
PIPO/LAOC	PIPO	PIPO
PIEN/PICO	Subalpine	Subalpine
PIPO/PIEN	PIPO	PIPO
ABGRC/LAOC	Mixed-conifer	Mixed-conifer
PSME/PICO	PSME-TSHE	Mixed-conifer
PICO/LAOC	Subalpine	Subalpine
QUGA4/PSME	Hardwood	Other
TSME/ABAM	Subalpine	Subalpine
ABAM/TSME	Subalpine	Subalpine
TSHE/ABPRSH	PSME-TSHE	PSME-TSHE
PSME/JUOC	PSME-TSHE	Mixed-conifer
PSME/CELE3	PSME-TSHE	Mixed-conifer
LAOC/PIPO	Mixed-conifer	Mixed-conifer
ABLA/PSME	Subalpine	Subalpine
ABLA/PIMO3	Subalpine	Subalpine
PICO/PSME	Subalpine	Subalpine
LAOC/PICO	Mixed-conifer	Mixed-conifer
THPL/PIEN	Other	Other
THPL/ABGRC	Other	Other
ABAM/PSME	Subalpine	Subalpine
ABLA/ABGRC	Subalpine	Subalpine
PSME/ABAM	PSME-TSHE	PSME-TSHE
QUGA4/PIPO	Hardwood	Other
PIEN	Subalpine	Subalpine
PIEN/ABLA	Subalpine	Subalpine
PSME/PIEN	PSME-TSHE	Mixed-conifer
PICO/PIEN	Subalpine	Subalpine
POTR5/PIPO	Hardwood	Other
LAOC/ABLA	Mixed-conifer	Mixed-conifer
PSME/ALRH2	PSME-TSHE	PSME-TSHE
PICO/POTR5	Subalpine	Subalpine
THPL/PSME	Other	Other
THPL	Other	Other
POBAT/PICO	Hardwood	Other
LAOC	Mixed-conifer	Mixed-conifer
LAOC/THPL	Mixed-conifer	Mixed-conifer
ABGRC/THPL	Mixed-conifer	Mixed-conifer
THPL/LAOC	Other	Other
LAOC/BEPAC	Mixed-conifer	Mixed-conifer
PSME/POTR5	PSME-TSHE	PSME-TSHE
POBAT	Hardwood	Other
POTR5/PSME	Hardwood	Other
POTR5	Hardwood	Other
ABLA/PIEN	Subalpine	Subalpine
ABAM/PIPO	Subalpine	Subalpine
LIDE3	Hardwood	Other
PSME/CHLA	PSME-TSHE	PSME-TSHE
QUGA4/PREM	Hardwood	Other
PIMO3/PSME	Other	Other
PIMO3/PIJE	Other	Other
PIMO3	Other	Other
PIMO3/PICO	Other	Other
PILA/CADE27	Other	Other
QUCH2/LIDE3	Hardwood	Other
LIDE3/CHCH7	Hardwood	Other
PILA/PSME	Other	Other
PIJE/CADE27	Other	Other
PIAT/PSME	Other	Other
PSME/PILA	PSME-TSHE	Mixed-conifer
LIDE3/ARME	Hardwood	Other
LIDE3/QUCH2	Hardwood	Other
PILA/PICO	Other	Other
UMCA/PIJE	Hardwood	Other
CHCH7/PSME	Hardwood	Other
PILA/LIDE3	Other	Other
QUCH2/PSME	Hardwood	Other
QUCH2/ARME	Hardwood	Other
PSME/PIAT	PSME-TSHE	PSME-TSHE
QUCH2	Hardwood	Other
TSME	Subalpine	Subalpine
TSME/PSME	Subalpine	Subalpine
ABPRSH/PICO	Subalpine	Subalpine
ABGRC/TSHE	Mixed-conifer	Mixed-conifer
ABPRSH/PSME	Subalpine	Subalpine
PICO/PIMO3	Subalpine	Subalpine
PSME/ABPRSH	PSME-TSHE	PSME-TSHE
TSME/PICO	Subalpine	Subalpine
PIMO3/PIPO	Other	Other
TSHE/CADE27	PSME-TSHE	PSME-TSHE
ABLA/TSME	Subalpine	Subalpine
ABAM/TSHE	Subalpine	Subalpine
ABGRC/ABLA	Mixed-conifer	Mixed-conifer
PIEN/TSME	Subalpine	Subalpine
ABGRC/TSME	Mixed-conifer	Mixed-conifer
PSME/TSME	PSME-TSHE	PSME-TSHE
ABPRSH/ABAM	Subalpine	Subalpine
PIEN/ABGRC	Subalpine	Subalpine
LAOC/ABGRC	Mixed-conifer	Mixed-conifer
PIAL/ABLA	Subalpine	Subalpine
ABLA/LAOC	Subalpine	Subalpine
ABGRC/TABR2	Mixed-conifer	Mixed-conifer
LAOC/PIEN	Mixed-conifer	Mixed-conifer
ABLA	Subalpine	Subalpine
ABPRSH/ABLA	Subalpine	Subalpine
PIAL	Subalpine	Subalpine
TSHE	PSME-TSHE	PSME-TSHE
ABAM/ABPRSH	Subalpine	Subalpine
ABLA/ABAM	Subalpine	Subalpine
ABLA/ABPRSH	Subalpine	Subalpine
PICO/ABAM	Subalpine	Subalpine
PSME/ABLA	PSME-TSHE	PSME-TSHE
ABAM/ABLA	Subalpine	Subalpine
ABAM/THPL	Subalpine	Subalpine
PSME/CHNO	PSME-TSHE	Mixed-conifer
THPL/TSHE	Other	Other
CHNO/ABAM	Other	Other
CHNO/ABLA	Other	Other
CHNO/TSHE	Other	Other
THPL/ABLA	Other	Other
PSME/POBAT	PSME-TSHE	PSME-TSHE
LALY/PIEN	Subalpine	Subalpine
PIEN/PSME	Subalpine	Subalpine
BEPAC/PSME	Hardwood	Other
TSHE/ABGRC	PSME-TSHE	PSME-TSHE
PIAL/PIEN	Subalpine	Subalpine
PICO/PIAL	Subalpine	Subalpine
PIEN/LAOC	Subalpine	Subalpine
ABLA/PIAL	Subalpine	Subalpine
LALY/PIAL	Subalpine	Subalpine
PIEN/PIAL	Subalpine	Subalpine
PIPO/QUKE	PIPO	PIPO
PIMO3/PIAT	Other	Other
CADE27/PIJE	Mixed-conifer	Mixed-conifer
PIMO3/CHLA	Other	Other
PIJE/PSME	Other	Other
ABGRC/PIJE	Mixed-conifer	Mixed-conifer
PIAT	Other	Other
TSME/ABGRC	Subalpine	Subalpine
ABGRC/PIBR	Mixed-conifer	Mixed-conifer
PSME/PIJE	PSME-TSHE	Mixed-conifer
QUCH2/CHCH7	Hardwood	Other
QUCH2/PILA	Hardwood	Other
PIJE	Other	Other
QUKE	Hardwood	Other
PIMO3/PILA	Other	Other
PSME/UMCA	PSME-TSHE	PSME-TSHE
PIPO/PILA	PIPO	PIPO
PILA/ABGRC	Other	Other
PSME/PIMO3	PSME-TSHE	Mixed-conifer
PILA/CHCH7	Other	Other
PILA/ABPRSH	Other	Other
ABPRSH/CHNO	Subalpine	Subalpine
PIPO/ABPRSH	PIPO	PIPO
PIAT/PICO	Other	Other
PSME/TABR2	PSME-TSHE	PSME-TSHE
PSME/PREM	PSME-TSHE	PSME-TSHE
ALRU2/TSHE	Hardwood	Other
POBAT/PIEN	Hardwood	Other
TSHE/ACMA3	PSME-TSHE	PSME-TSHE
ABAM/ABGRC	Subalpine	Subalpine
ABPRSH/TSHE	Subalpine	Subalpine
CHNO/PSME	Other	Other
TSHE/CHNO	PSME-TSHE	PSME-TSHE
ABAM/PIEN	Subalpine	Subalpine
TSHE/PISI	PSME-TSHE	PSME-TSHE
ABLA/LALY	Subalpine	Subalpine
PIPO/THPL	PIPO	PIPO
PIMO3/THPL	Other	Other
PIAL/PICO	Subalpine	Subalpine
TSHE/PICO	PSME-TSHE	PSME-TSHE
LALY	Subalpine	Subalpine
LAOC/POTR5	Mixed-conifer	Mixed-conifer
LAOC/TSHE	Mixed-conifer	Mixed-conifer
THPL/BEPAC	Other	Other
PSME/BEPAC	PSME-TSHE	PSME-TSHE
ABLA/THPL	Subalpine	Subalpine
LAOC/POBAT	Mixed-conifer	Mixed-conifer
THPL/POBAT	Other	Other
PIEN/TSHE	Subalpine	Subalpine
ABLA/TSHE	Subalpine	Subalpine
TSME/PIEN	Subalpine	Subalpine
PIAL/PSME	Subalpine	Subalpine
TSHE/PIMO3	PSME-TSHE	PSME-TSHE
PSME/ACGLD4	PSME-TSHE	PSME-TSHE
THPL/ABAM	Other	Other
ABAM/CHNO	Subalpine	Subalpine
CHNO	Other	Other
PISI/TSHE	Other	Other
TSME/PIAL	Subalpine	Subalpine
QUCH2/PIPO	Hardwood	Other
PIAT/CHCH7	Other	Other
QUGA4/QUCH2	Hardwood	Other
LIDE3/PSME	Hardwood	Other
PIJE/PILA	Other	Other
CHLA/PIJE	Other	Other
PIMO3/PIBR	Other	Other
PIPO/PIMO3	PIPO	PIPO
CHCH7/PILA	Hardwood	Other
PIAT/PIPO	Other	Other
PIMO3/ABPRSH	Other	Other
POBAT/THPL	Hardwood	Other
ABAM/PICO	Subalpine	Subalpine
TSME/TSHE	Subalpine	Subalpine
ABAM/ALRU2	Subalpine	Subalpine
ABAM/PIMO3	Subalpine	Subalpine
PIPO/POBAT	PIPO	PIPO
LALY/ABLA	Subalpine	Subalpine
PICO/THPL	Subalpine	Subalpine
PIAL/LALY	Subalpine	Subalpine
POBAT/LAOC	Hardwood	Other
PIEN/BEPAC	Subalpine	Subalpine
THPL/POTR5	Other	Other
CADE27/ARME	Mixed-conifer	Mixed-conifer
ARME/QUCH2	Hardwood	Other
ACMA3	Hardwood	Other
QUKE/QUGA4	Hardwood	Other
PILA/QUKE	Other	Other
ABGRC/ARME	Mixed-conifer	Mixed-conifer
ARME/PIPO	Hardwood	Other
PILA/QUCH2	Other	Other
ARME/ACMA3	Hardwood	Other
QULO	Hardwood	Other
PISA2/QUCH2	Other	Other
ARME/QULO	Hardwood	Other
QUCH2/QUKE	Hardwood	Other
PIPO/CELE3	PIPO	PIPO
PIJE/PIPO	Other	Other
ABGRC/PIMO3	Mixed-conifer	Mixed-conifer
ALRH2/PSME	Hardwood	Other
ALRH2	Hardwood	Other
QUKE/QUWI2	Hardwood	Other
CELE3	Hardwood	Other
PIJE/PIAT	Other	Other
PILA/PIPO	Other	Other
CHCH7/CONU4	Hardwood	Other
ABGRC/ACGL	Mixed-conifer	Mixed-conifer
CELE3/PIPO	Hardwood	Other
CADE27/PIPO	Mixed-conifer	Mixed-conifer
ACMA3/PRUNU	Hardwood	Other
CHCH7/ARME	Hardwood	Other
CELE3/PSME	Hardwood	Other
TSME/PIMO3	Subalpine	Subalpine
FRLA/ACMA3	Hardwood	Other
ACGL	Hardwood	Other
TSHE/TSME	PSME-TSHE	PSME-TSHE
JUOC/ACGL	JUOC	JUOC
JUOC/QUGA4	JUOC	JUOC
PIPO/LIDE3	PIPO	PIPO
THPL/BEPA	Other	Other
TSME/THPL	Subalpine	Subalpine
LIDE3/PIPO	Hardwood	Other
PSME/ACGL	PSME-TSHE	PSME-TSHE
ALRU2/ACMA3	Hardwood	Other
ALRU2/LIDE3	Hardwood	Other
THPL/PICO	Other	Other
THPL/ACGL	Other	Other
PIEN/ACGL	Subalpine	Subalpine
BEPA/ALRU2	Hardwood	Other
PIPO/ALRH2	PIPO	PIPO
PIMO3/PIEN	Other	Other
PSME/CONU4	PSME-TSHE	PSME-TSHE
PIPO/BEPA	PIPO	PIPO
ACGL/PIPO	Hardwood	Other
TSHE/PIEN	PSME-TSHE	PSME-TSHE
PSME/PIAL	PSME-TSHE	PSME-TSHE
ALRU2/PREM	Hardwood	Other
PIPO/QUCH2	PIPO	PIPO
ABLA/CHNO	Subalpine	Subalpine
PIEN/PIMO3	Subalpine	Subalpine
PIAT/QUCH2	Other	Other
LAOC/ACGL	Mixed-conifer	Mixed-conifer
PIJE/QUCH2	Other	Other
CHNO/TSME	Other	Other
TSME/CHNO	Subalpine	Subalpine
LALY/TSME	Subalpine	Subalpine
PIEN/LALY	Subalpine	Subalpine
POTR5/ACMA3	Hardwood	Other
QUDO	Hardwood	Other
QUGA4/JUOC	Hardwood	Other
ACMA3/QUKE	Hardwood	Other
CHCH7/CADE27	Hardwood	Other
LIDE3/QUWI2	Hardwood	Other
ARME/LIDE3	Hardwood	Other
CADE27/FRLA	Mixed-conifer	Mixed-conifer
PIPO/CHCH7	PIPO	PIPO
BEPA/THPL	Hardwood	Other
ALRU2/ABAM	Hardwood	Other
PICO/TSHE	Subalpine	Subalpine
QUGA4/PISA2	Hardwood	Other
PSME/QULO	PSME-TSHE	PSME-TSHE
ACGL/PSME	Hardwood	Other
PISI/ALRU2	Other	Other
PIAL/TSME	Subalpine	Subalpine
ABGRC/PILA	Mixed-conifer	Mixed-conifer
ABAM/TABR2	Subalpine	Subalpine
BEPA/PSME	Hardwood	Other
LAOC/BEPA	Mixed-conifer	Mixed-conifer
PIEN/PIPO	Subalpine	Subalpine
PSME/PIMU	PSME-TSHE	Mixed-conifer
ALRU2/ACGL	Hardwood	Other
POBAT/PIPO	Hardwood	Other
POBAT/PSME	Hardwood	Other
PIEN/THPL	Subalpine	Subalpine
PSME/BEPA	PSME-TSHE	PSME-TSHE
CADE27/ALRU2	Mixed-conifer	Mixed-conifer
SAAL2/POBAT	Hardwood	Other
LALY/ABAM	Subalpine	Subalpine
PIMO3/ABGRC	Other	Other
CADE27/ACMA3	Mixed-conifer	Mixed-conifer
PIMO3/ABAM	Other	Other
ABAM/LAOC	Subalpine	Subalpine
ACMA3/PREM	Hardwood	Other
